# Supplementary material for: Urine-Based Molecular Diagnostic Tests for Leishmaniasis Infection in Human and Canine Populations: A Meta-Analysis
Source: PubMed Central journal article supplement (PMC7996766; doi:10.3390/pathogens10030269), 2021-02-27

**Supplementary Table S1: The QUADAS tool Item**

| Item                                                                                                                                                               | Yes  | No  | Unclear |
|--------------------------------------------------------------------------------------------------------------------------------------------------------------------|------|-----|---------|
| 1. Was the spectrum of patients representative of the patients who will receive the test in practice?                                                              | (13) | (-) | (-)     |
| 2. Were selection criteria clearly described?                                                                                                                      | (13) | (-) | (-)     |
| 3. Is the reference standard likely to correctly classify the target condition?                                                                                    | (13) | (-) | (-)     |
| 4. Is the time period between reference standard and index test short enough to be reasonably sure that the target condition did not change between the two tests? | (8)  | (-) | (5)     |
| 5. Did the whole sample or a random selection of the sample, receive verification using a reference standard of diagnosis?                                         | (13) | (-) | (-)     |
| 6. Did patients receive the same reference standard regardless of the index test result?                                                                           | (13) | (-) | (-)     |
| 7. Was the reference standard independent of the index test (i.e., the index test did not form part of the reference standard)?                                    | (13) | (-) | (-)     |
| 8. Was the execution of the index test described in sufficient detail to permit replication of the test?                                                           | (10) | (-) | (3)     |
| 9. Was the execution of the reference standard described in sufficient detail to permit its replication?                                                           | (13) | (-) | (-)     |
| 10. Were the index test results interpreted without knowledge of the results of the reference standard?                                                            | (-)  | (3) | (10)    |
| 11. Were the reference standard results interpreted without knowledge of the results of the index test?                                                            | (13) | (-) | (-)     |
| 12. Were the same clinical data available when test results were interpreted as would be available when the test is used in practice?                              | (13) | (-) | (-)     |
| 13. Were uninterpretable/ intermediate test results reported?                                                                                                      | (13) | (-) | (-)     |
| 14. Were withdrawals from the study explained?                                                                                                                     | (13) | (-) | (-)     |

**Supplementary Table S2: The Quadas Tool 2**

|                         | Bias              |            |                    |                 | Applicability     |            |                    |
|-------------------------|-------------------|------------|--------------------|-----------------|-------------------|------------|--------------------|
|                         | PATIENT SELECTION | INDEX TEST | REFERENCE STANDARD | FLOW AND TIMING | PATIENT SELECTION | INDEX TEST | REFERENCE STANDARD |
| Mirzaei                 | Low               | Low        | Low                | Low             | Low               | Low        | Low                |
| Mirzaei                 | Low               | Low        | Low                | Low             | Low               | Low        | Low                |
| Da Costa Lima Junior    | Low               | High       | Low                | Low             | Low               | Low        | Low                |
| Pessoa-E-Silva          | Low               | Low        | Low                | Low             | Low               | Low        | Low                |
| Almerice Lopes da Silva | Low               | Low        | Low                | Low             | Low               | Low        | Low                |
| Hernández               | Low               | Low        | Low                | Low             | Low               | Low        | Low                |
| Phumee                  | Low               | Low        | Low                | Low             | Low               | Low        | Low                |
| Veland                  | Low               | High       | Low                | Low             | Low               | Low        | Low                |
| Fisa                    | Low               | Low        | Low                | Low             | Low               | Low        | Low                |
| Motazedian              | Low               | Low        | Low                | Low             | Low               | Low        | Low                |
| Manna                   | Low               | Low        | Low                | Low             | Low               | Low        | Low                |
| Solano-Gallego          | Low               | Unclear    | Low                | Low             | Low               | Low        | Low                |
| Francesch               | Low               | High       | Low                | Low             | Low               | Low        | Low                |

Supplementary Figure S1: The Quadas Tool 2 graph

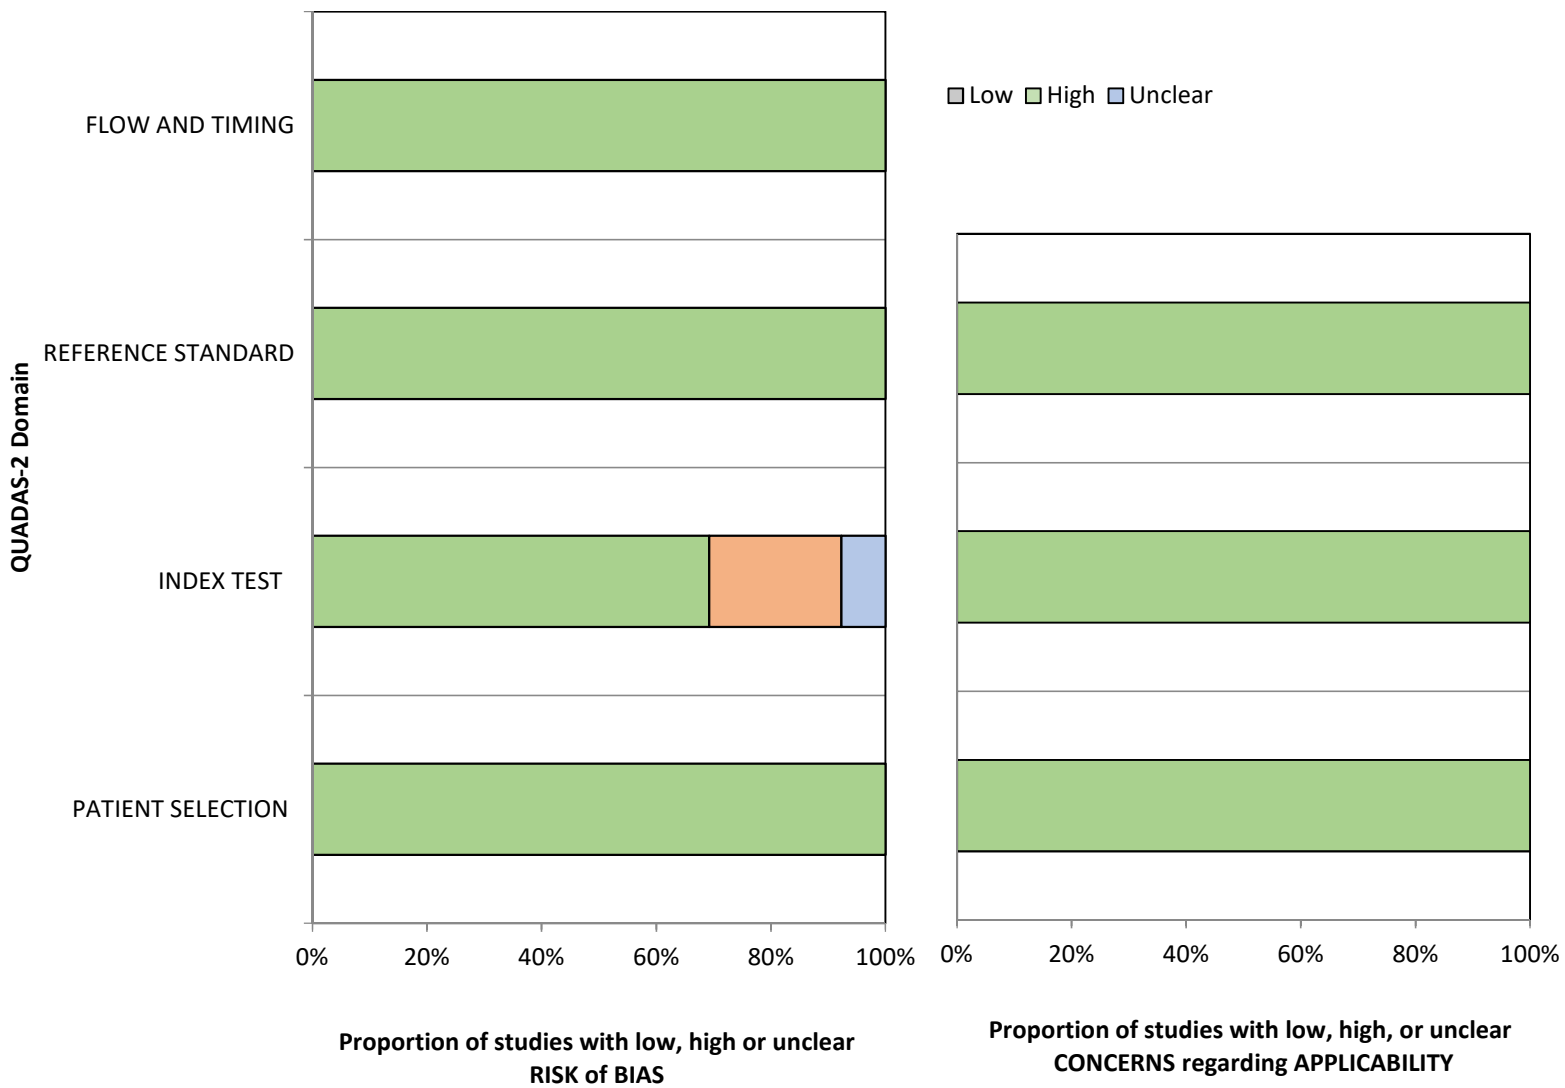

Supplement: pathogens-10-00269-s001.pdf [file pathogens-10-00269-s001.pdf]
